# Supplementary material
Source: MDPI journal article supplement (https://www.mdpi.com/2305-6290/3/4/20)
Supplement: s1 [file s1]

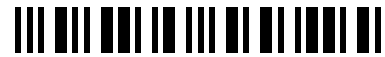

**Before starting the survey please read the following “Terms and Definitions” for better understanding of the survey questions.**

### **Terms/Definitions**

#### **Autonomous Vehicles (AVs) or self-driving cars**

**(Level 4 & 5 automation as defined by NHTSA)**

**Fully autonomous vehicle makes all major driving decisions, including avoiding obstacles, braking, distance between vehicles, following traffic rules, lane-choice, routing, speed, and steering, itself. The role of the driver is therefore limited primarily to choose the destination. (Surden and Williams, 2016)**

#### **Carsharing**

**Carsharing operates as short-term rental where their members are able to rent a car which is typically located at an on-street parking space. Members of the carsharing program pick up the car at the parking location, drive to a nearby destination and finally pay the rental when finished with their trip. (Fagnant and Kockel-man, 2014)**

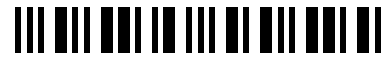

## Section A: Section A: DEMOGRAPHICS

This section gives a demographic overview of the participants.

This is an anonymous survey. The data will only be processed within the framework of the bachelor thesis and will be treated confidentially.

### A1. Age

- Under 18 ☐
- 18-22 years ☐
- 23-27 years ☐
- 28-32 years ☐
- 33-37 years ☐
- 38-42 years ☐
- 43-47 years ☐
- 48-52 years ☐
- 53-59 years ☐
- 60 years or above ☐

### A2. Gender

- Female ☐
- Male ☐

### A3. What is the highest degree or level of school you have completed?

- No degree ☐
- Secondary school ☐
- Matura/Higher school certificate ☐
- Bachelor's degree ☐
- Master's degree or higher ☐
- Other ☐

Other

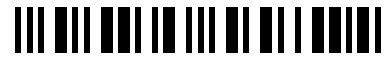

**A4. Please indicate the occupational field you are working in**

- Student ☐
- Health and social services ☐
- Education and teaching ☐
- Trade ☐
- Manufacturing (production) ☐
- Construction ☐
- Unemployed ☐
- Other ☐

Other

**A5. Please indicate your household size (principal residence)**

- One-person household ☐
- Two-person household ☐
- Three-person household ☐
- More than three-person household ☐

**A6. Do you live in a city or in the countryside (principal residence)?**

- City ☐
- Countryside ☐

**A7. How many cars are available in your household (principal residence)?**

- No car ☐
- 1 ☐
- 2 ☐
- More than 2 ☐

**A8. Are you allowed to drive a car in Austria?**

- Yes ☐
- No ☐

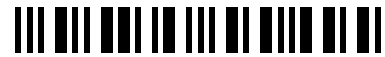

## Section B: Section B: CURRENT USAGE OF CARS AND WILLINGNESS TO DRIVE AN AV

Please tell us about your current usage of cars and your willingness to drive AVs.

**B1. How often do you use the following means of transport in everyday life, for example, to commute and for free time activities (cycling as an exercise is excluded)?**

**Never = not at any time Rarely = 1 time a month Sometimes = 1 time a week Very often = 2 to 4 times a week Always = every day**

|                                           | Never                    | Rarely                   | Sometimes                | Very often               | Always                   |
|-------------------------------------------|--------------------------|--------------------------|--------------------------|--------------------------|--------------------------|
| Car                                       | <input type="checkbox"/> |
| Bicycle                                   | <input type="checkbox"/> |
| Public transportation (bus, train, metro) | <input type="checkbox"/> |
| Taxi (including Uber/Mietwagen)           | <input type="checkbox"/> |

**B2. When buying a new car, how important you think the following features will be to you?**

**Very important = feature has essential importance Important = feature has great importance Neutral = feature has moderate importance Slightly important = feature has little importance Not important = feature has no importance**

*Parking Assistance assists the driver during the parking process. Sensors detect the parking space and maneuver the vehicle into it. The driver only has to operate the brake, throttle and gear lever.*

*Navigation Systems support the driver to get to the desired destination. The system accesses information such as GPS and road maps.*

*Conventional Cruise Control makes it possible to maintain a constant driving speed without standing on the accelerator pedal.*

*Adaptive Cruise Control System detects distances to other road users and adapts the speed to them. The vehicle automatically maintains the safety distance.*

*Automatic Transmission Mode, the driver no longer has to operate the gear lever, it is shifted automatically. All the driver has to do is operate the throttle and the brake.*

*Pedestrian Warning System warns the driver when a pedestrian appears at a certain distance.*

*Lane Keep Assist System keeps a driver within the lane boundaries by automatically correcting the steering.*

|                                | Very important           | Important                | Neutral                  | Slightly important       | Not important            |
|--------------------------------|--------------------------|--------------------------|--------------------------|--------------------------|--------------------------|
| Parking Assistance             | <input type="checkbox"/> |
| Navigation System              | <input type="checkbox"/> |
| Conventional Cruise Control    | <input type="checkbox"/> |
| Adaptive Cruise Control System | <input type="checkbox"/> |

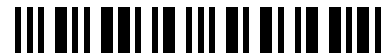

|                             | Very important           | Important                | Neutral                  | Slightly important       | Not important            |
|-----------------------------|--------------------------|--------------------------|--------------------------|--------------------------|--------------------------|
| Automatic Transmission Mode | <input type="checkbox"/> |
| Pedestrian Warning System   | <input type="checkbox"/> |
| Lane Keep Assist System     | <input type="checkbox"/> |

**B3. What are the potential use case scenarios of an AV for you?**

**Highly likely = highly preferred use case scenario Likely = preferred use case scenario Neutral = possible use case scenario Not likely = not preferred use case scenario Very unlikely = strongly not preferred use case scenario**

|                                                    | Highly likely            | Likely                   | Neutral                  | Not likely               | Very unlikely            |
|----------------------------------------------------|--------------------------|--------------------------|--------------------------|--------------------------|--------------------------|
| I would use it for personal use only               | <input type="checkbox"/> |
| I would use it for personal use and for carsharing | <input type="checkbox"/> |

**Section C: Section C: CHALLENGES OF AVS**

Please let us know what challenges we will face with the introduction of AVs.

**C1. Assume that conventional cars are replaced by self-driving cars. What are your concerns?**

**Strongly agree = many concerns about the introduction of AVs Agree = some concerns about the introduction of AVs Neutral = possible concerns about the introduction of AVs Disagree = little concerns about the introduction of AVs Strongly disagree = absolutely no concerns about the introduction of AVs**

|                                                                                   | Strongly agree           | Agree                    | Neutral                  | Disagree                 | Strongly disagree        |
|-----------------------------------------------------------------------------------|--------------------------|--------------------------|--------------------------|--------------------------|--------------------------|
| Technology could be defective and subsequently cause accidents (safety concerns)  | <input type="checkbox"/> |
| The transition from old to new technology could lead to problems on the road      | <input type="checkbox"/> |
| Legal issues such as liability in case of accidents occur                         | <input type="checkbox"/> |
| Due to high acquisition costs nationwide implementation will not be possible      | <input type="checkbox"/> |
| Because of always online connectivity AVs will be prone to cyber security threats | <input type="checkbox"/> |

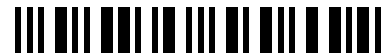

**C2. How safe would you feel in an AV vs. a conventional car?**

**Very safe = very high feeling of safety Safe = high feeling of safety**  
**Neutral = neither safe nor unsafe Slightly unsafe = low feeling of safety**  
**Very unsafe = very low feeling of safety**

|                                         | Very safe                | Safe                     | Neutral                  | Slightly unsafe          | Very unsafe              |
|-----------------------------------------|--------------------------|--------------------------|--------------------------|--------------------------|--------------------------|
| Feeling of safety in a conventional car | <input type="checkbox"/> |
| Feeling of safety in an AV              | <input type="checkbox"/> |

**C3. Imagine you buy a new AV – Which of the following will convince you for buying a new AV?**

|                                             |                          |
|---------------------------------------------|--------------------------|
| Car seller/dealer                           | <input type="checkbox"/> |
| Friends/Family recommendation               | <input type="checkbox"/> |
| Advertisement from the company/manufacturer | <input type="checkbox"/> |
| I would do my own research                  | <input type="checkbox"/> |

**Section D: Section D: OWNERSHIP / SHARING OF AVS**

This section deals with the ownership of conventional cars and with the possibility of cooperation of AVs. Please tell us your opinion. Multiple answers are possible.

**D1. Which of the following reasons/statement will motivate you to share/lend your AV?**

|                                                                        |                          |
|------------------------------------------------------------------------|--------------------------|
| I would rent a car to make some extra money (rental for fees)          | <input type="checkbox"/> |
| Carsharing is ecofriendly and I care about CO2 emissions/environment   | <input type="checkbox"/> |
| If sharing of cars will get me some kind of tax relief from government | <input type="checkbox"/> |
| I can never think of sharing my car                                    | <input type="checkbox"/> |
| Other                                                                  | <input type="checkbox"/> |

Other

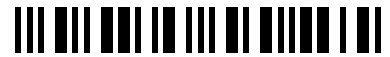

**D2. Under what conditions can you imagine not owning a car anymore?**

When public transport is better developed/very well connected ☐

When operation costs for cars (fuel, insurance, etc.) are rising ☐

When there are more people offering carsharing ☐

Other ☐

Other

**Section E: Section E: TIMELINE**

Please let us know what you think about the following.

**E1. When do you think the following scenarios will take place?**

|                                                                | 2025                     | 2030                     | 2035                     | 2040 or later            | Never                    |
|----------------------------------------------------------------|--------------------------|--------------------------|--------------------------|--------------------------|--------------------------|
| First AV on Austrian roads                                     | <input type="checkbox"/> |
| Private use of an AV                                           | <input type="checkbox"/> |
| Conventional cars are completely replaced by self-driving ones | <input type="checkbox"/> |

**Thank you for taking part in the survey.**
